# Supplementary material for: Income Inequality in Italian Regions: an Empirical Study on the Mitigating Role of Organisation-Based Volunteering
Source: Research Square preprint supplement (doi:10.21203/rs.3.rs-4896150/v1), 2024-09-11
Supplement: Supplementary file 1 [file 09c9d996e1bc29efbc2cae4a.docx]

**Table A2.** Robustness test II

| **Dependent variable: *Gini*** | | |
| --- | --- | --- |
|  | **(1)**  **POLS** | **(2)**  **2SLS** |
| *Volunt_tot* | -0.060*** | -0.100*** |
|  | (0.017) | (0.019) |
| *Primary_emp* | 0.038*** | 0.043*** |
|  | (0.011) | (0.010) |
| *Tertiary_emp* | 0.575*** | 0.523*** |
|  | (0.059) | (0.066) |
| *Dep_ratio* | -0.538*** | -0.570*** |
|  | (0.076) | (0.082) |
| *Welfare* | -0.108*** | -0.095*** |
|  | (0.010) | (0.015) |
| Area dummies | Yes | Yes |
| Time dummies | Yes | Yes |
| R2 | 0.753 | 0.747 |
| **First stage of IV-2SLS estimate (Dependent variable: *Volunt_tot*)** | | |
| *Sep_waste* |  | 0.079*** |
|  |  | (0.023) |
| *Volunttot_lag* |  | 0.589*** |
|  |  | (0.072) |
| R2 |  | 0.899 |
| Weak identification test (F) |  | 56.832 |
| *(Kleibergen-Paap rk Wald F statistic)* |
| Underidentification test (p-value) |  | 0.004 |
| *(Kleibergen-Paap rk LM statistic)* |
| Weak instrument robust test (p-value) |  | 0.000 |
| *(Anderson-Rubin Wald test)* |
| Overidentification test (p-value) |  | 0.443 |
| *(Hansen J statistic)* |
| N. of observations | 231 | 231 |
| N. of regions | 21 | 21 |

Notes: Standard errors clustered by region in parentheses. Level of significance: 10% (*), 5% (**), and 1% (***). All variables included in the model are log-transformed (natural logarithm). All estimates include a constant term (not shown). Due to space limitations, we only report the instrumental variables results for the first stage regression in 2SLS model. Full results are available upon request.
