# Supplementary material for: Income Inequality in Italian Regions: an Empirical Study on the Mitigating Role of Organisation-Based Volunteering
Source: Research Square preprint supplement (doi:10.21203/rs.3.rs-4896150/v1), 2024-09-11
Supplement: Supplementary file 2 [file 40ef91a58040da3924709ac3.docx]

**Table A3.** Robustness test III

| **Dependent variable: *Gini*** | | |
| --- | --- | --- |
|  | **(1)**  **POLS** | **(2)**  **2SLS** |
| *Volunt* | -0.060*** | -0.169*** |
|  | (0.017) | (0.037) |
| *Primary_emp* | 0.038*** | 0.030*** |
|  | (0.011) | (0.010) |
| *Tertiary_emp* | 0.575*** | 0.398*** |
|  | (0.059) | (0.088) |
| *Dep_ratio* | -0.538*** | -0.539*** |
|  | (0.076) | (0.052) |
| *Welfare* | -0.108*** | -0.096*** |
|  | (0.010) | (0.011) |
| Area dummies | Yes | Yes |
| Time dummies | Yes | Yes |
| R2 | 0.753 | 0.743 |
| **First stage of IV-2SLS estimate (Dependent variable: *Volunt*)** | | |
| *Sep_waste* |  | 0.074** |
|  |  | (0.034) |
| *Volunt_lag* |  | 0.293*** |
|  |  | (0.055) |
| R2 |  | 0.837 |
| Weak identification test (F) |  | 13.350 |
| *(Kleibergen-Paap rk Wald F statistic)* |
| Underidentification test (p-value) |  | 0.027 |
| *(Kleibergen-Paap rk LM statistic)* |
| Weak instrument robust test (p-value) |  | 0.000 |
| *(Anderson-Rubin Wald test)* |
| Overidentification test (p-value) |  | 0.924 |
| *(Hansen J statistic)* |
| N. of observations | 209 | 209 |
| N. of regions | 19 | 19 |

Notes: Standard errors clustered by region in parentheses. Level of significance: 10% (*), 5% (**), and 1% (***). All variables included in the model are log-transformed (natural logarithm). All estimates include a constant term (not shown). Due to space limitations, we only report the instrumental variables results for the first stage regression in 2SLS model. Full results are available upon request.
