# Supplementary material for: Income Inequality in Italian Regions: an Empirical Study on the Mitigating Role of Organisation-Based Volunteering
Source: Research Square preprint supplement (doi:10.21203/rs.3.rs-4896150/v1), 2024-09-11
Supplement: Supplementary file 3 [file 4b2e98b50f81744d80ba5399.docx]

**Table A1.** Robustness test I

| **Dependent variable: *Income_ineq*** | | |
| --- | --- | --- |
|  | **(1)**  **POLS** | **(2)**  **2SLS** |
| *Volunt* | -0.145*** | -0.229*** |
|  | (0.050) | (0.081) |
| *Primary_emp* | 0.047 | 0.054* |
|  | (0.033) | (0.029) |
| *Tertiary_emp* | 1.375*** | 1.274*** |
|  | (0.189) | (0.221) |
| *Dep_ratio* | -0.806*** | -0.862*** |
|  | (0.185) | (0.186) |
| *Welfare* | -0.269*** | -0.250*** |
|  | (0.029) | (0.030) |
| Area dummies | Yes | Yes |
| Time dummies | Yes | Yes |
| R2 | 0.770 | 0.766 |
| **First stage of IV-2SLS estimate (Dependent variable: *Volunt*)** | | |
| *Sep_waste* |  | 0.080*** |
|  |  | (0.024) |
| *Volunt_lag* |  | 0.549*** |
|  |  | (0.115) |
| R2 |  | 0.881 |
| Weak identification test (F) |  | 26.221 |
| *(Kleibergen-Paap rk Wald F statistic)* |
| Underidentification test (p-value) |  | 0.019 |
| *(Kleibergen-Paap rk LM statistic)* |
| Weak instrument robust test (p-value) |  | 0.004 |
| *(Anderson-Rubin Wald test)* |
| Overidentification test (p-value) |  | 0.123 |
| *(Hansen J statistic)* |
| N. of observations | 231 | 231 |
| N. of regions | 21 | 21 |

Notes: Standard errors clustered by region in parentheses. Level of significance: 10% (*), 5% (**), and 1% (***). All variables included in the model are log-transformed (natural logarithm). All estimates include a constant term (not shown). Due to space limitations, we only report the instrumental variables results for the first stage regression in 2SLS model. Full results are available upon request.
