# Supplementary material for: Income Inequality in Italian Regions: an Empirical Study on the Mitigating Role of Organisation-Based Volunteering
Source: Research Square preprint supplement (doi:10.21203/rs.3.rs-4896150/v1), 2024-09-11
Supplement: Supplementary file 4 [file 71a30d99af1ae71eb08600cb.docx]

**Table A4.** Robustness test IV

|  | **(1)**  **PCSE** | **(2)**  **FGLS** |
| --- | --- | --- |
| *Volunt* | -0.057*** | -0.074*** |
|  | (0.020) | (0.020) |
| *Primary_emp* | 0.038*** | 0.102*** |
|  | (0.011) | (0.029) |
| *Tertiary_emp* | 0.577*** | 0.362 |
|  | (0.052) | (0.241) |
| *Dep_ratio* | -0.538*** | -0.185 |
|  | (0.078) | (0.222) |
| *Welfare* | -0.116*** | -0.100*** |
|  | (0.013) | (0.027) |
| Area dummies | Yes | Yes |
| Time dummies | Yes | Yes |
| R2 | 0.878 |  |
| N. of observations | 231 | 231 |
| N. of regions | 21 | 21 |

Notes: Standard errors in parentheses. Level of significance: 10% (*), 5% (**), and 1% (***). All variables included in the model are log-transformed (natural logarithm). All estimates include a constant term (not shown).
