# Supplementary material for: Income Inequality in Italian Regions: an Empirical Study on the Mitigating Role of Organisation-Based Volunteering
Source: Research Square preprint supplement (doi:10.21203/rs.3.rs-4896150/v1), 2024-09-11
Supplement: Supplementary file 5 [file 9d6d363f8fcead1f01d3cfc0.docx]

**Table A5.** Summary statistics of additional variables

| **Variable** | **Source** | **Years** | **Mean** | **S.D.** | **Min** | **Max** |
| --- | --- | --- | --- | --- | --- | --- |
| *Income_ineq* | ISTAT on EU-SILC data | 2010-2020 | 5.187 | 1.220 | 3.300 | 10.000 |
| *Volunt_tot* | ISTAT - Multipurpose survey on households: aspects of daily life | 2010-2020 | 14.935 | 7.074 | 6.500 | 41.100 |
| *Volunttot_lag* | ISTAT - Multipurpose survey on households: aspects of daily life | 2001-2011 | 13.938 | 7.472 | 5.200 | 41.300 |
